# Supplementary material for: Topical Fungal Infection Induces Shifts in the Gut Microbiota Structure of Brown Planthopper, Nilaparvata lugens (Homoptera: Delphacidae)
Source: MDPI journal article supplement (doi:10.3390/insects13060528), 2022-06-08
Supplement: s1 [file s1]

1 **Table S1.** Specific primer pairs of the gut-homeostasis-related genes for qRT-PCR.

| Genes          | Description                          | Primers     | Sense/Antisense primer sequences (5'-3')                |
|----------------|--------------------------------------|-------------|---------------------------------------------------------|
| <i>PGRP-LC</i> | Peptidoglycan recognition protein LC | PGRP-LC-F/R | TGGTGCGAAACATCCAGGACTTC/TGCGGTAGCTGTAAATGTACCTATG<br>ΔG |
| <i>cLys</i>    | c-type lysozyme                      | cLys-F/R    | TATCGACAACATCAGAAGC/TCATACACTATCACCCCAA                 |
| <i>iLys1</i>   | i-type lysozyme 1                    | iLys1-F/R   | GAGATGTGTGCGGTGTTTTTC/AGCTGTCCCCTGTTGTGTAA              |
| <i>iLys2</i>   | i-type lysozyme 2                    | iLys2-F/R   | TGAAGATAATCCCAACAG/AGAGTACCTCAAACCAAA                   |
| <i>iLys3</i>   | i-type lysozyme 3                    | iLys3-F/R   | AGGAGATGTCTGCGGCATC/TTGTACTGAGCGTCGAGCG                 |
| <i>iLys6</i>   | i-type lysozyme 6                    | iLys6-F/R   | AGTCTGAGGGAGCATACCA/TTCTTCAAACACTCGGGAA                 |
| <i>iLys7</i>   | i-type lysozyme 7                    | iLys7-F/R   | TTTCCTGGTTTTAGTTATCGCTA/GATTGCTGAAGATTCACACATTG         |
| <i>defA</i>    | Defensin A                           | defA -F/R   | GCCTCTGTGATGGCACTGTA/TGGTTCGGAGTCACCCATTG               |
| <i>defB</i>    | Defensin B                           | defB -F/R   | TGCCTCTGTAATGGCACTGTA/GGAGTCACCCATTTGCTGTTG             |
| <i>Duox1</i>   | Dual oxidase 1                       | duox1-F/R   | TCGAGAACGGAACCCTGCTG/GCGAAAGAAAAGGATGCCGAA              |
| 18S rRNA       | Internal standard gene               | 18S-F/R     | GTAACCCGCTGAACCTCC/GTCCGAAGACCTCACTAAATCA               |

2
